# Supplementary material for: Nanoparticle-delivered miR-486-5p inhibits H 2 O 2 -induced injury in cultured endothelial and kidney tubular epithelial cells
Source: Royal Society of Chemistry journal article supplement (doi:10.1039/d5na00581g), 2025-12-15
Supplement: d5na00581g1.pdf [file d5na00581g1.pdf]

## **Supplementary Information**

### **Nanoparticle-Delivered miR-486-5p Inhibits H<sub>2</sub>O<sub>2</sub>-Induced Injury in Cultured Endothelial and Kidney Tubular Epithelial Cells**

Ali O. Maadelat<sup>1,2,3&</sup>, Savindi Wehella<sup>2,3&</sup>, Adrianna Douvris<sup>1,2,3</sup>, Shireesha Manturthi<sup>2,3,4</sup>, Kevin D.  
Burns<sup>1,2,3\*</sup>, and Suresh Gadde<sup>2,3,4,5,6\*</sup>

1. Division of Nephrology, Department of Medicine, University of Ottawa, Ottawa, ON.
2. Kidney Research Centre, Ottawa Hospital Research Institute, Ottawa, ON.
3. Department of Cellular and Molecular Medicine, Faculty of Medicine, University of Ottawa, Ottawa, ON.
4. Ottawa Institute of Systems Biology, Faculty of Medicine, University of Ottawa, Ottawa, ON.
5. Centre for Infection, Immunity, and Inflammation, Faculty of Medicine, University of Ottawa, Ottawa, ON.
6. Ottawa-Carleton Institute for Biomedical Engineering (OCIBME), Ottawa, ON.

& Contributed equally.

\* Corresponding authors:

Suresh Gadde, [suresh.gadde@uottawa.ca](mailto:suresh.gadde@uottawa.ca)

Kevin D. Burns, [kburns@toh.ca](mailto:kburns@toh.ca)

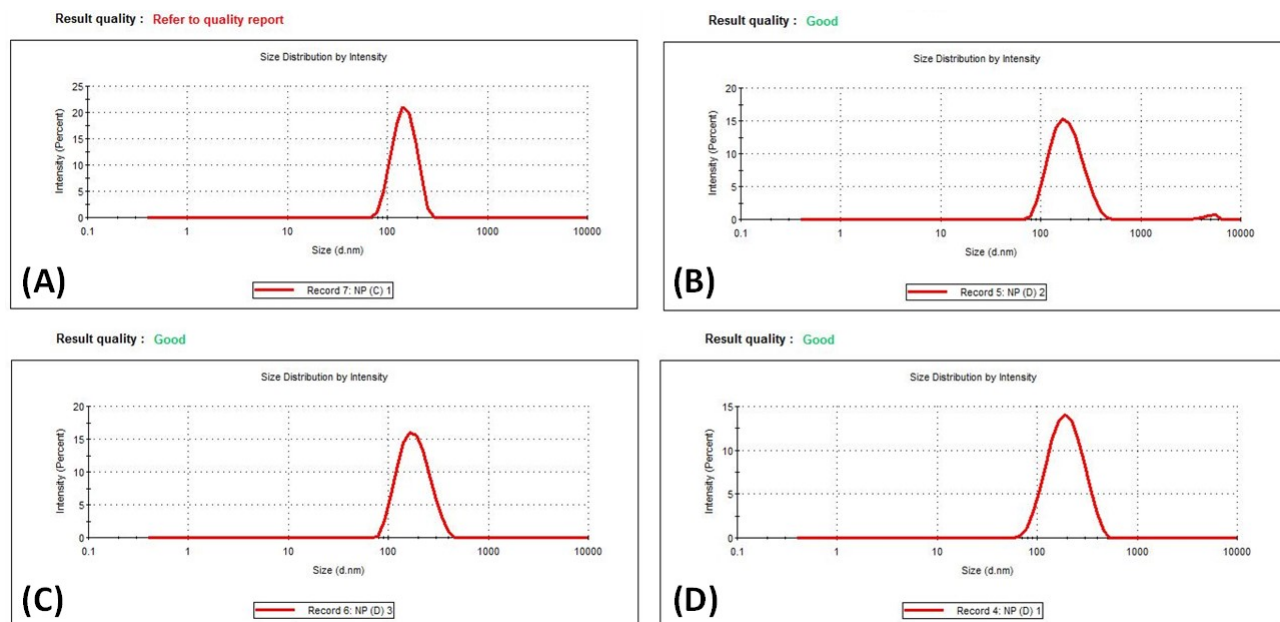

**Fig.S1 | Dynamic light scattering (DLS) data measured by Zetasizer.** Measurement of NP size distribution on intensity-size graphs for (A) polymeric (PNP), (B) hybrid (HNP), (C) poloxamer-based 1 (PI-NP1), and (D) poloxamer-based 2 nanoparticles (PI-NP2).

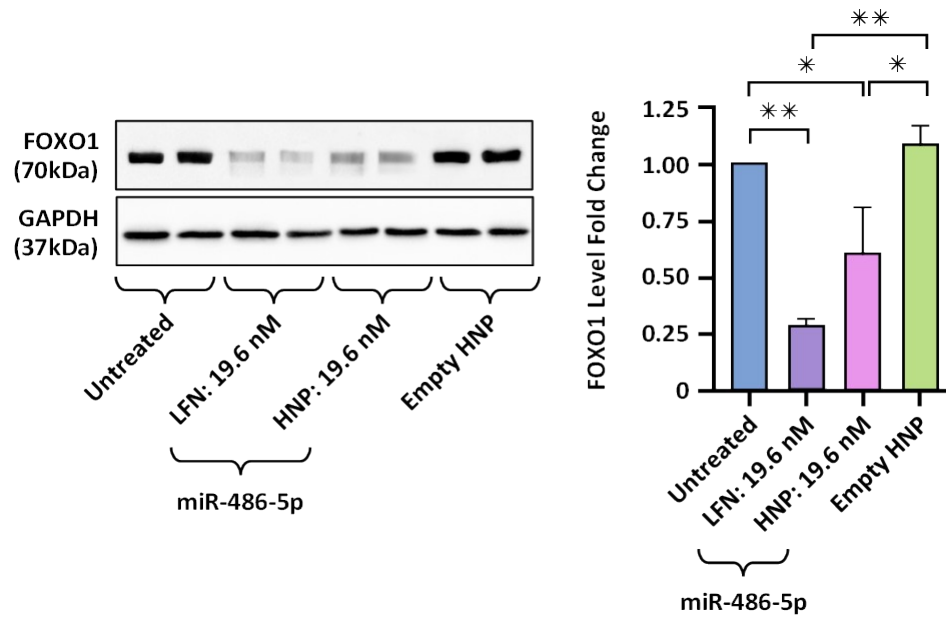

**Fig.S2 | Functional assessment of hybrid nanoparticle (HNP)-encapsulated miR-486-5p on HK2 cells.** Mean levels of FOXO1 protein relative to negative control (untreated cells) and the housekeeping GAPDH protein (loading control), measured by western blotting in HK2 cells (n=3) 72 h post-treatment with HNPs that were either empty or encapsulating 19.6 nM of miR-486-5p. Each pair of bands represents technical duplicates. Lipofectamine (LFN)-borne miR-486-5p acted as positive controls.  $\uparrow P < 0.05$ .  $\uparrow\uparrow P < 0.01$ . Statistical analysis performed by one- or two-way ANOVA. HNP hybrid nanoparticle. Error bars represent standard error. FOXO1 forkhead box O1. GAPDH glyceraldehyde-3-phosphate dehydrogenase.

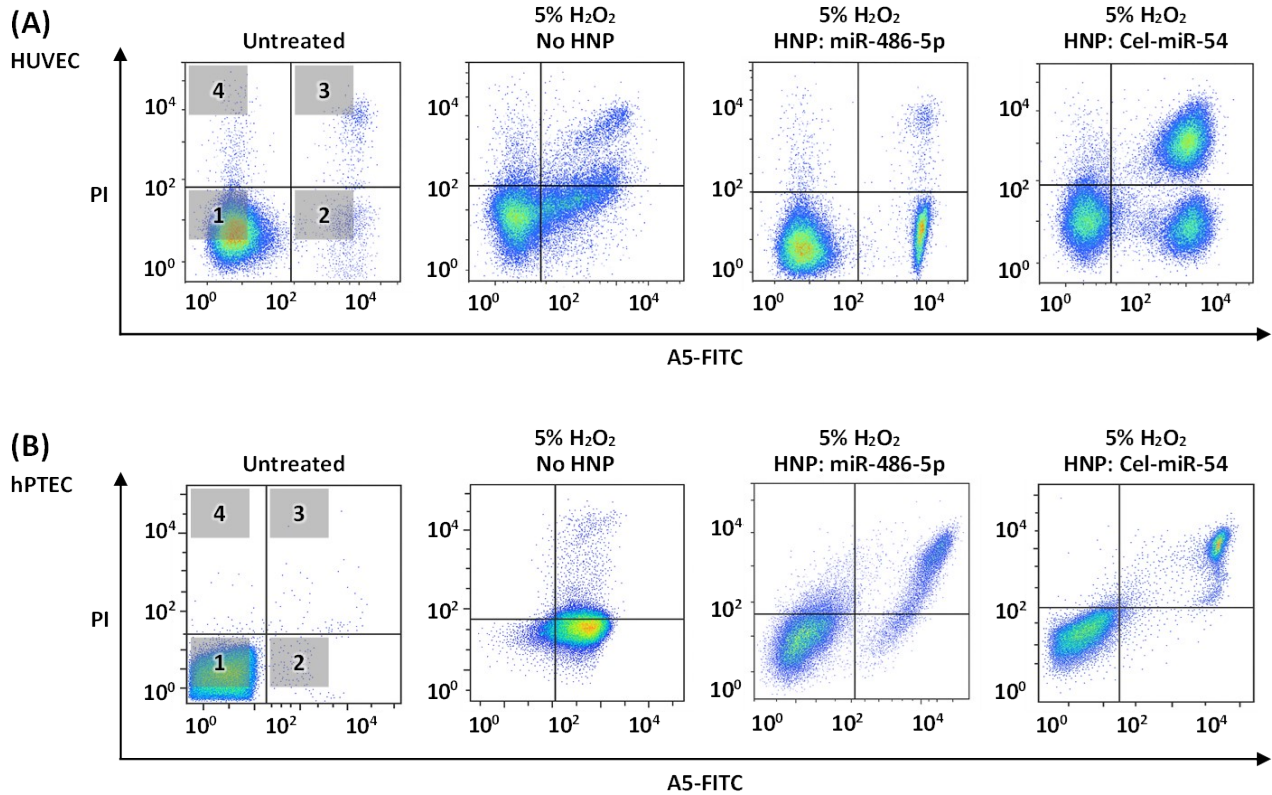

**Fig.S3 | Apoptosis assessment in cells treated with miR-486-5p-loaded hybrid nanoparticles (HNPs).** Flow cytometry plots depicting apoptotic stages of **(A)** HUVECs (n=1,2) and **(B)** hPTECs (n=1) at 72 h post-treatment with HNPs that were either empty or encapsulating 19.6 nM of miR-486-5p or Cel-miR-54. All cells were exposed to 5% hydrogen peroxide (H<sub>2</sub>O<sub>2</sub>) for 2 h prior to staining. Cells were labeled with propidium iodide (PI) and annexin5 (A5-FITC) to assess apoptosis. In each plot, quadrant gating denotes: Q1 – viable (unstained) cells; Q2 – early apoptotic (A5<sup>+</sup>/PI<sup>-</sup>) cells; Q3 – late apoptotic (A5<sup>+</sup>/PI<sup>+</sup>) cells; and Q4 – necrotic (A5<sup>-</sup>/PI<sup>+</sup>) cells. HNP hybrid nanoparticle. FITC fluorescein isothiocyanate.

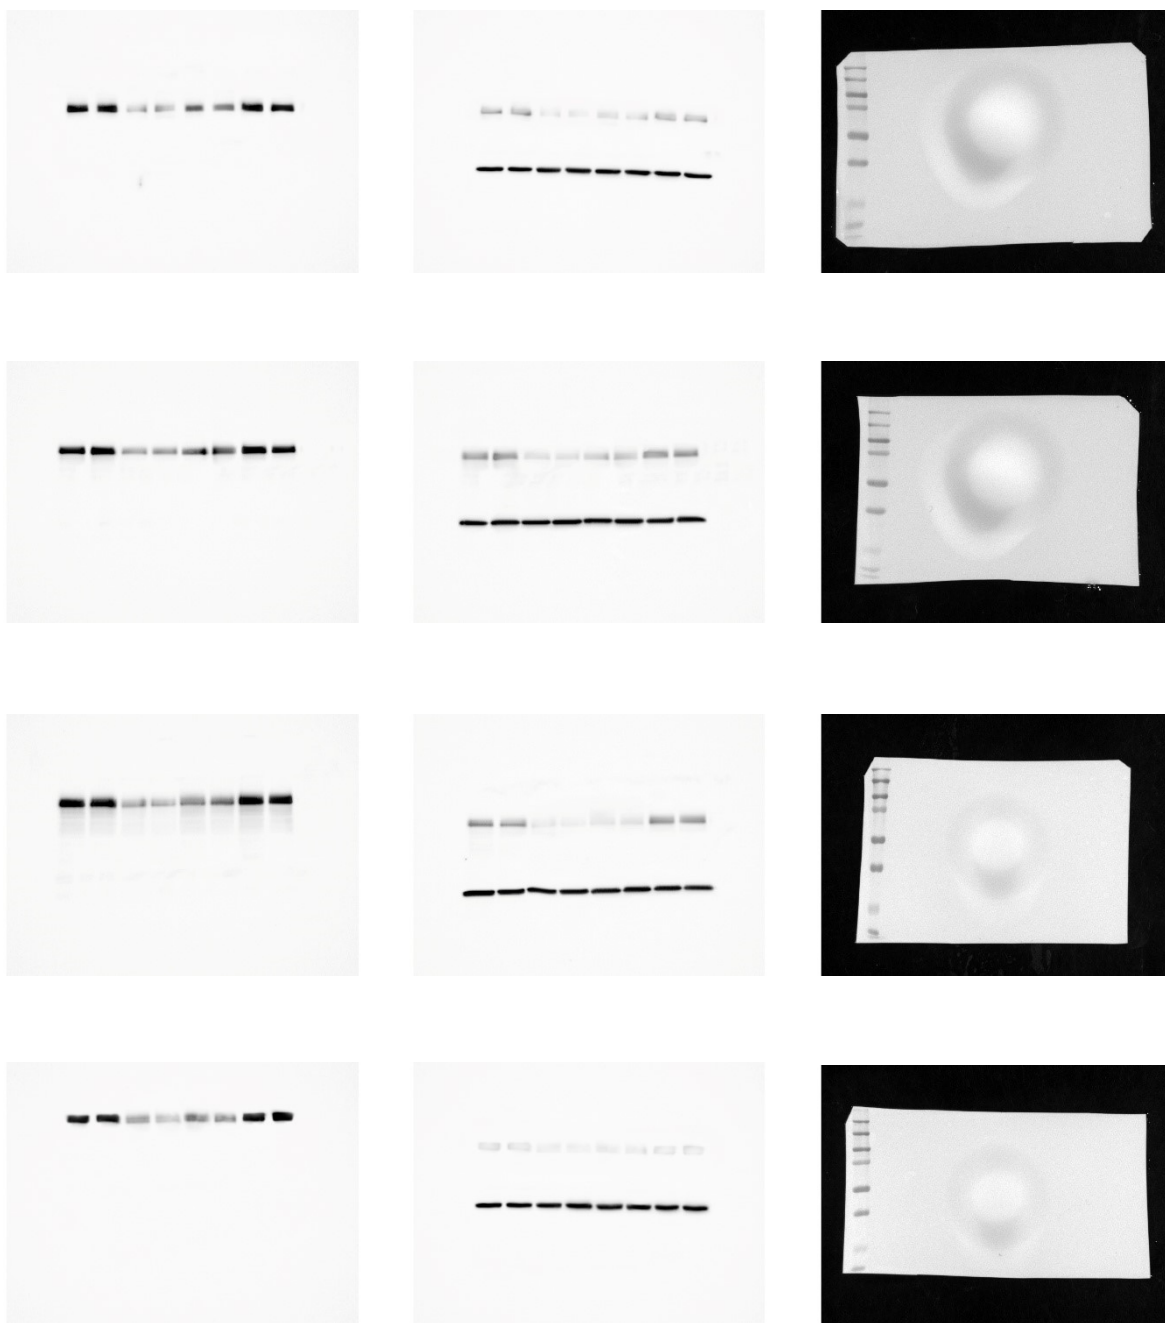

**Fig.S4 | Unedited western blot images of all replicates for Fig.5A.** Four replicates of HUVECs that were untreated or treated with lipofectamine plus miR-486-5p, miR-486-5p-loaded HNPs, and empty HNPs. The left, middle, and right panels respectively represent FOXO1 bands, GAPDH bands, and the ladders.

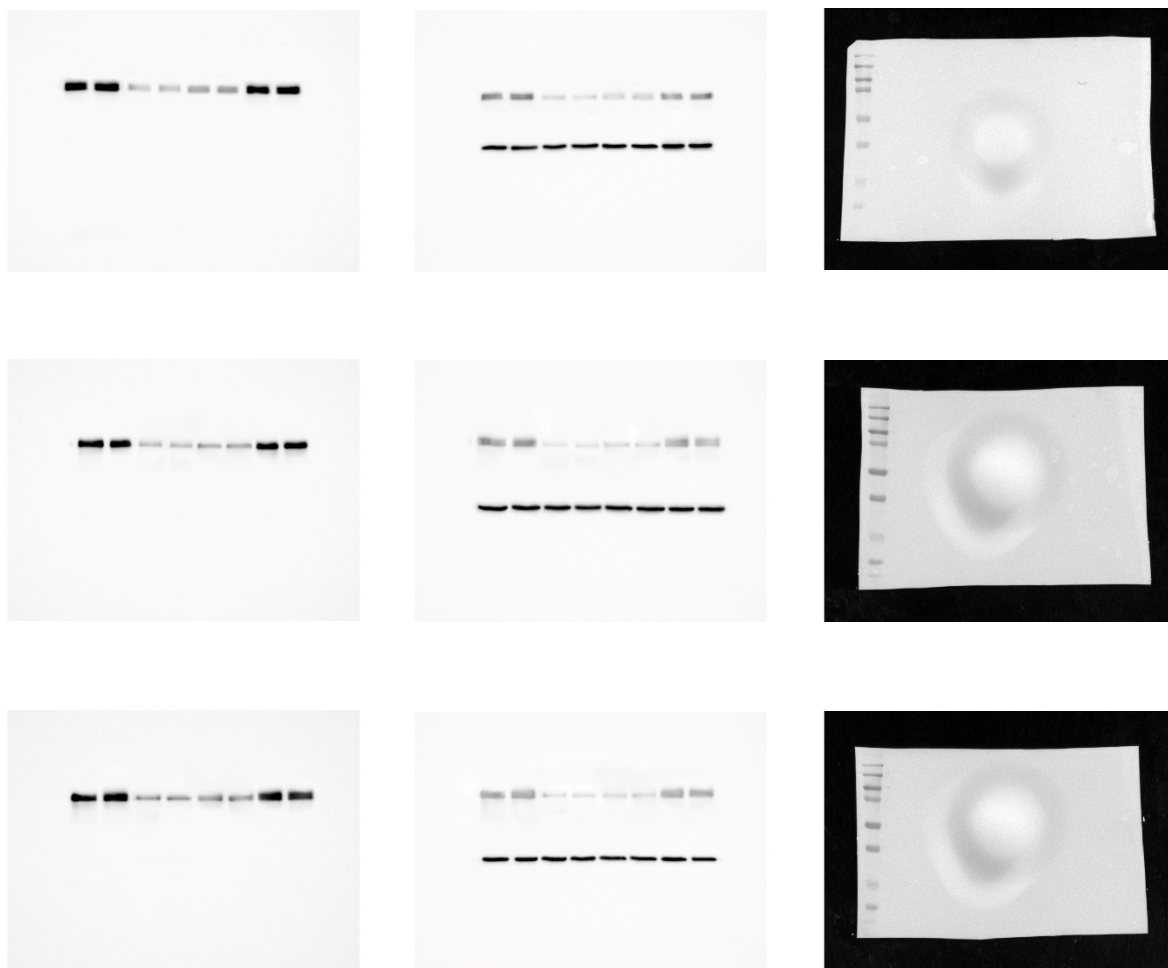

**Fig.S5 | Unedited western blot images of all replicates for Fig.5B.** Three replicates of hPTECs that were untreated or treated with lipofectamine plus miR-486-5p, miR-486-5p-loaded HNPs, and empty HNPs. The left, middle, and right panels respectively represent FOXO1 bands, GAPDH bands, and the ladders.

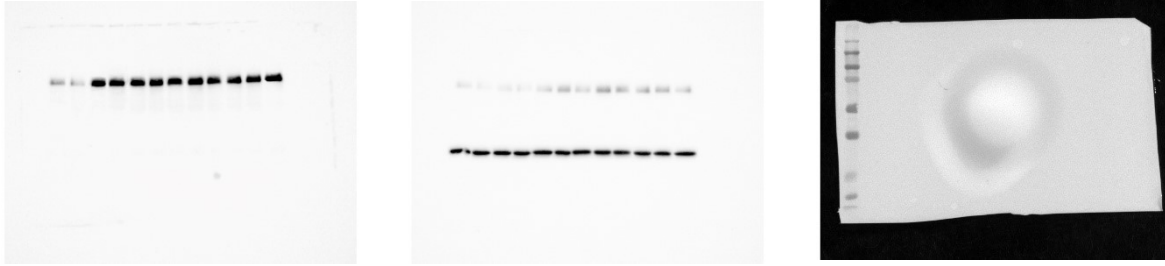

**Fig.S6 | Unedited western blot images of Fig.5C.** One replicate of HUVECs that were untreated or treated with lipofectamine plus miR-486-5p; Cel-miR-54-loaded HNPs; and miR-486-5p-loaded PNPs, PI-NP1s, and PI-NP2s. The left, middle, and right panels respectively represent FOXO1 bands, GAPDH bands, and the ladders.

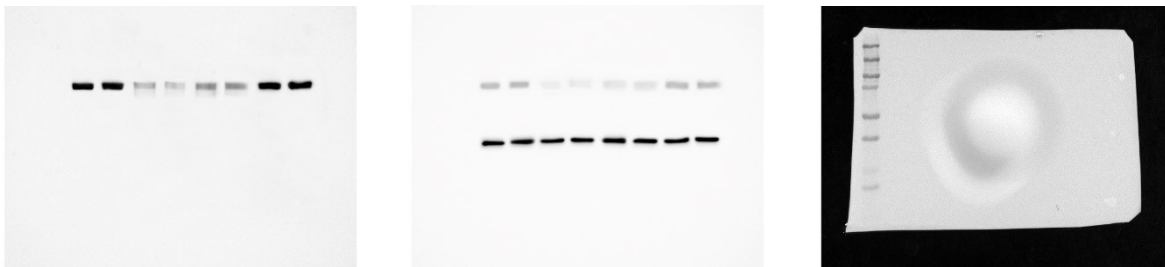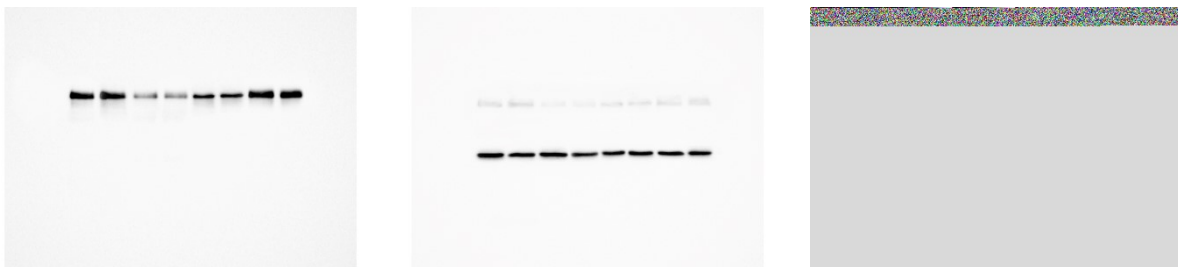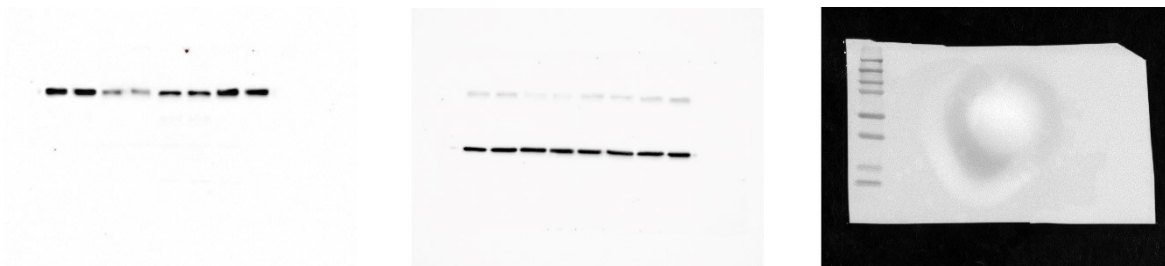

**Fig.S7 | Unedited western blot images of all replicates for supplemental Fig.2.** Three replicates of HK2 cells that were untreated or treated with lipofectamine plus miR-486-5p, miR-486-5p-loaded HNPs, and empty HNPs. The left, middle, and right panels respectively represent FOXO1 bands, GAPDH bands, and the ladders.
